# Supplementary material for: A thiol-anchored solvatochromic and fluorogenic molecular rotor for covalent protein labeling in SDS-PAGE and mitochondria specific fluorescence imaging
Source: Royal Society of Chemistry journal article supplement (doi:10.1039/d4ay00376d), 2024-01-01
Supplement: d4ay00376d1.pdf [file d4ay00376d1.pdf]

*Electronic Supplementary Information*

**A Thiol-Anchored Solvatochromic and Fluorogenic Molecular Rotor for  
Covalent Protein Labeling in SDS-PAGE and Mitochondria Specific  
Fluorescence Imaging**

Chao Wang\*, Yujie Wang, Mengxiang Feng, Rongrong Yuan, Guang Chen\*

College of Chemistry and Chemical Engineering, Shaanxi Key Laboratory of Chemical Additives for  
Industry, Shaanxi University of Science and Technology, Xi'an 710021, China. E-mail:  
wangchao@sust.edu.cn, chenandguang@163.com

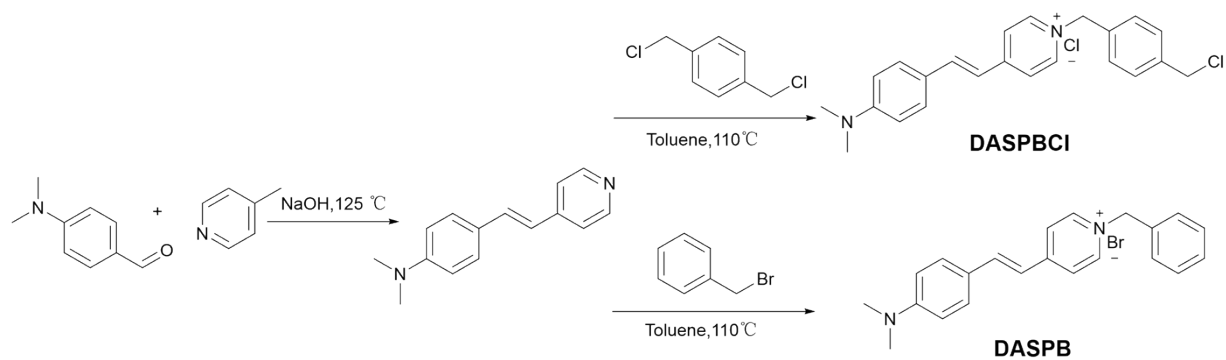

**Scheme S1.** Synthetic of the probes **DASPBCl** and **DASPB**.

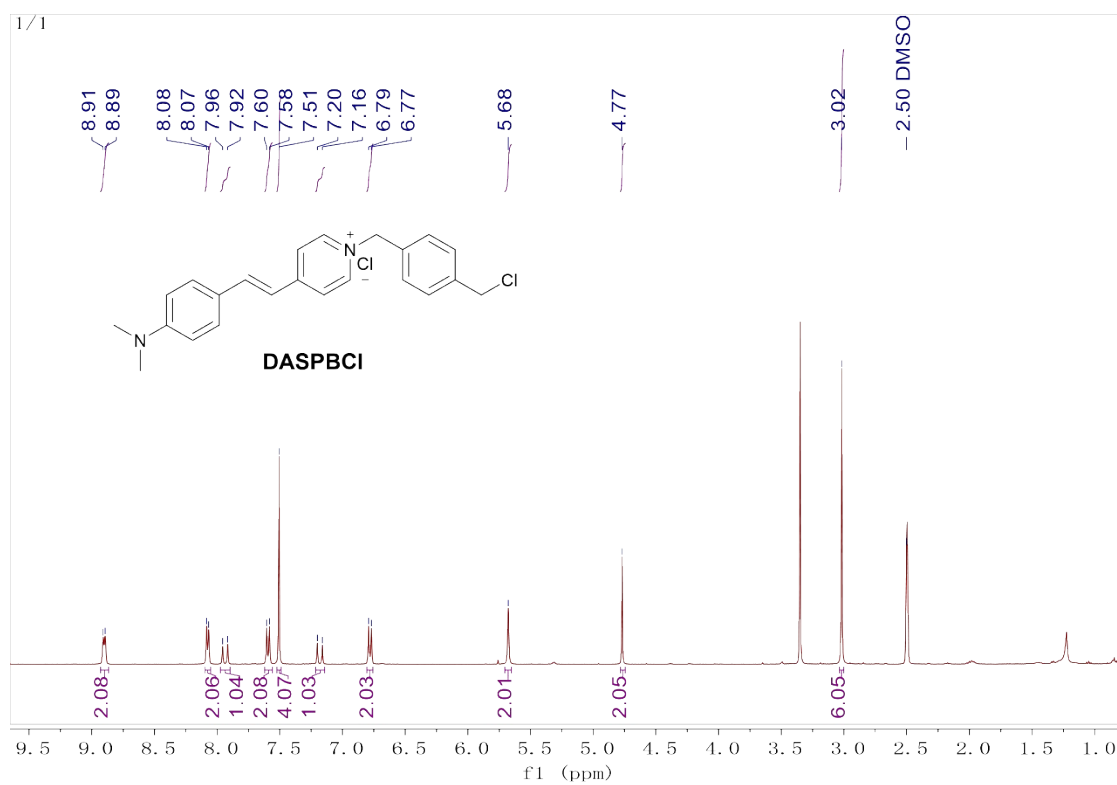

**Fig S1.**  $^1\text{H}$  NMR spectrum of **DASPBCl**.

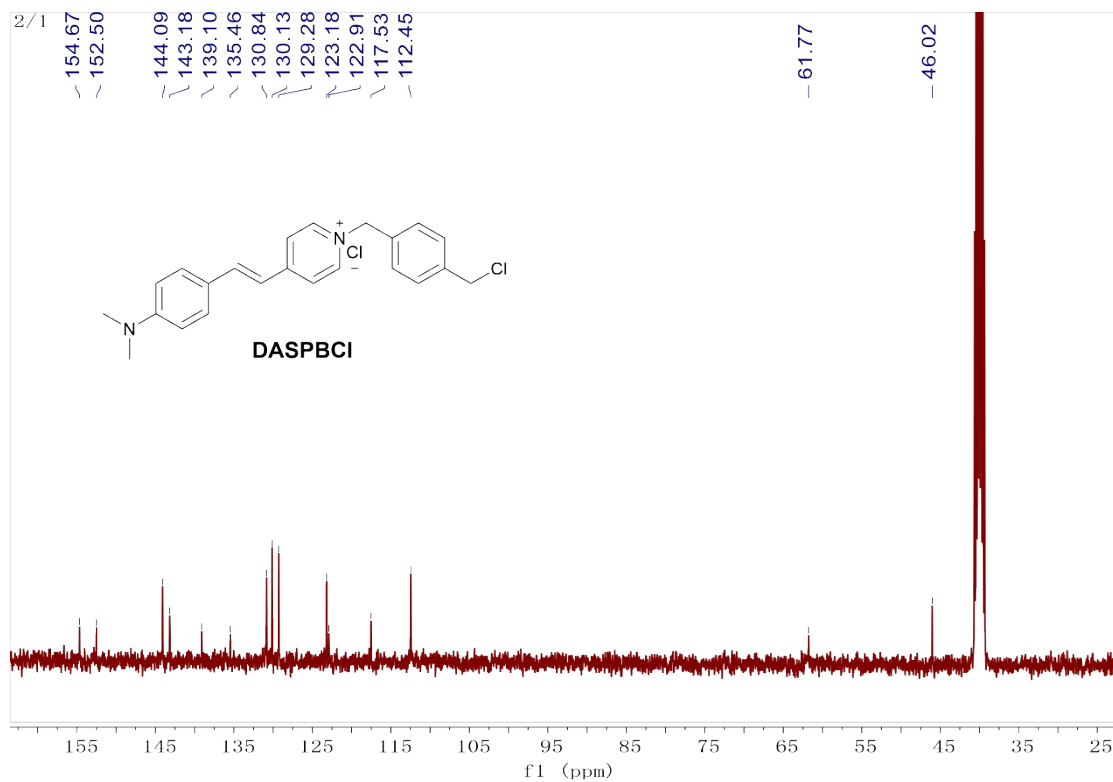

**Fig S2.**  $^{13}\text{C}$  NMR spectrum of **DASPBCl**.

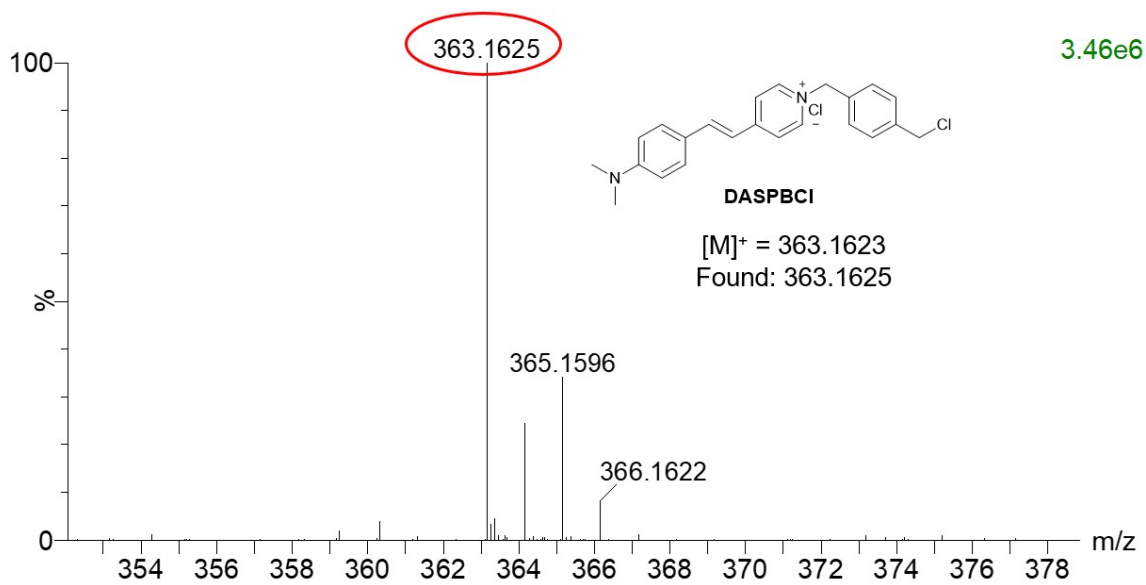

**Fig S3.** HRMS of **DASPBCl**.

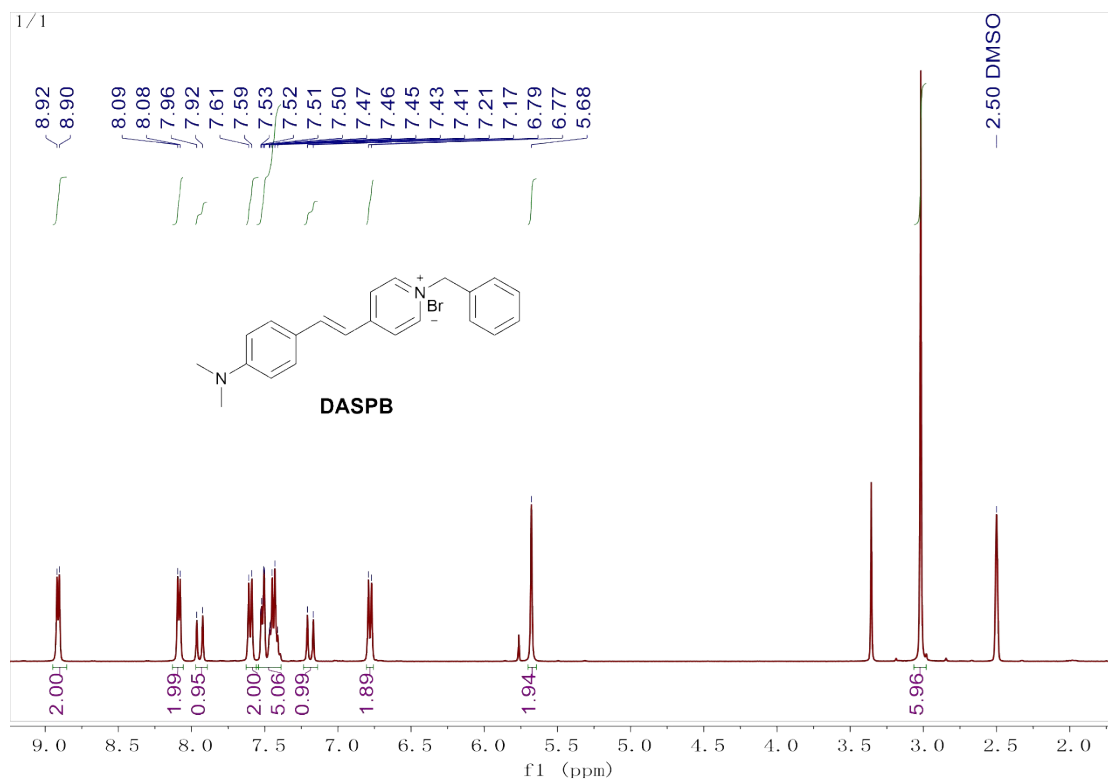

**Fig S4.**  $^1\text{H}$  NMR spectrum of **DASPB**.

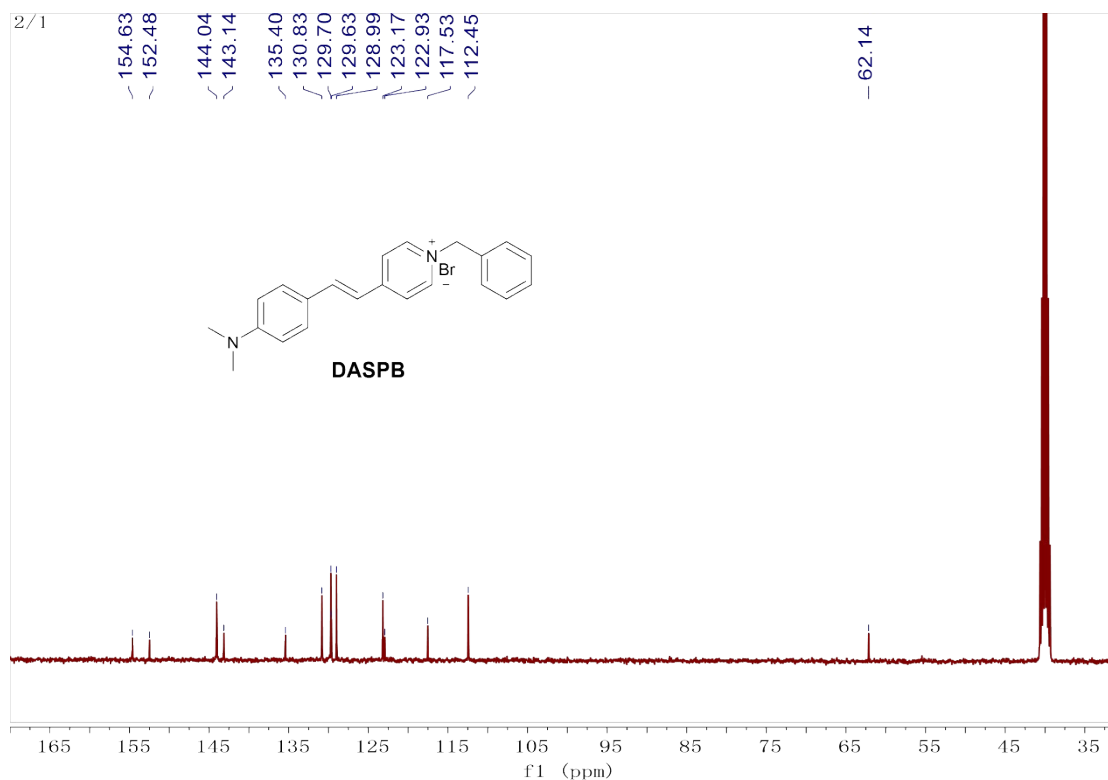

**Fig S5.**  $^{13}\text{C}$  NMR spectrum of **DASPB**.

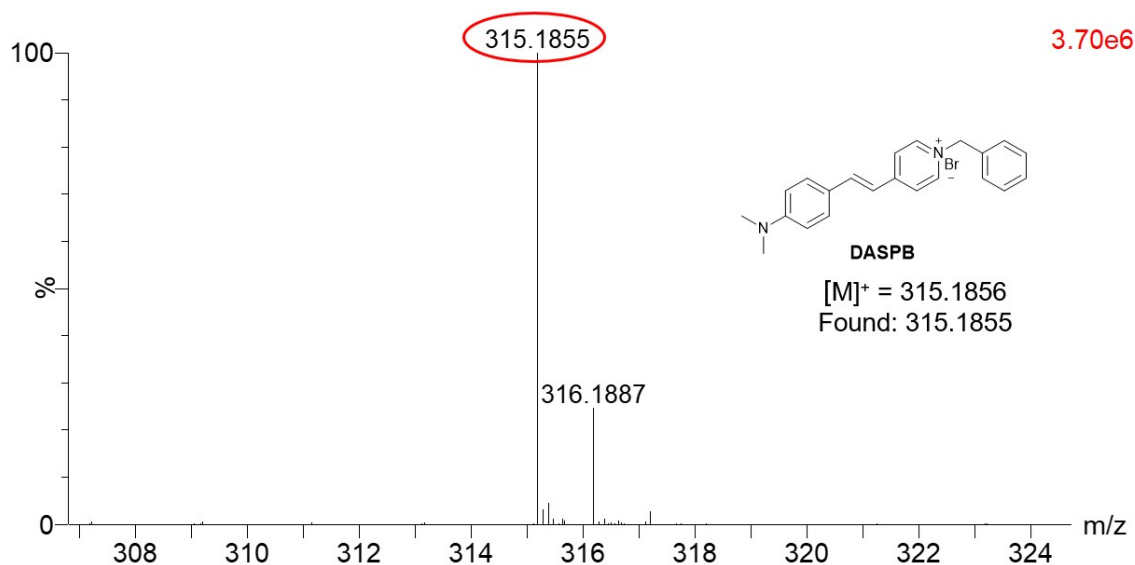

**Fig S6.** HRMS of **DASPB**.

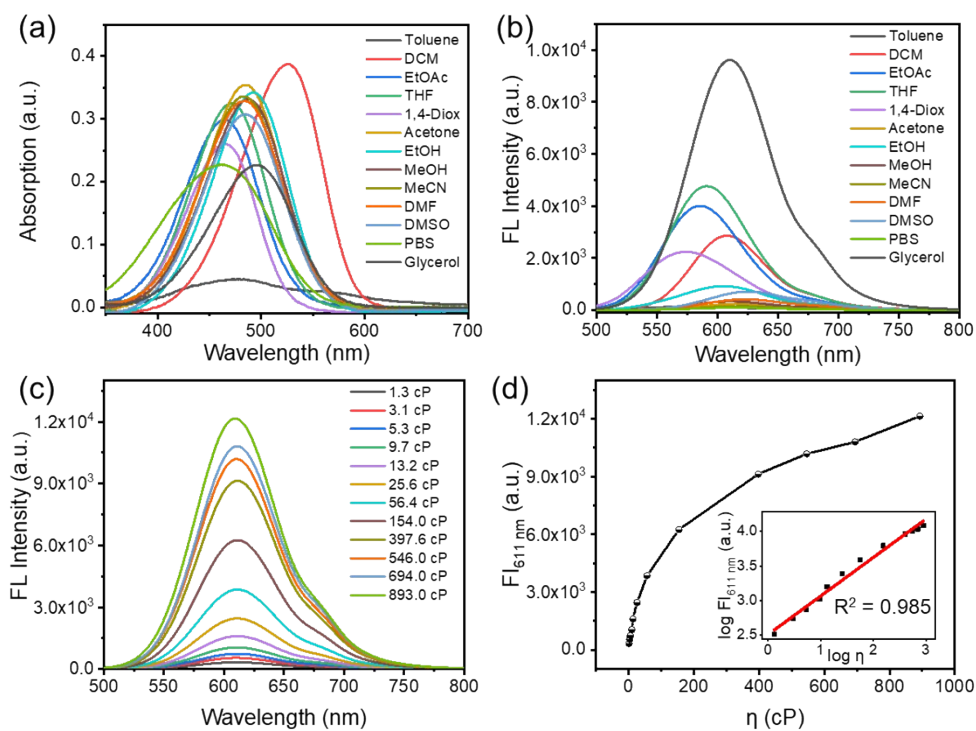

**Fig S7.** (a) Absorption spectra of **DASPB** (10 μM) in different solvents. (b) Fluorescence spectra of **DASPB** (10 μM) in different solvents. (c) Fluorescence spectra of **DASPB** (10 μM) with the variation of solution viscosity (methanol-glycerol system),  $\lambda_{ex} = 480$  nm. (d) The relationship between fluorescence intensity (FI) at 611 nm and viscosity ( $\eta$ ) of methanol-glycerol solution. Inset: The linear relationship between  $\log FI_{611 \text{ nm}}$  and  $\log \eta$ . ( $\log FI = 0.557 \log \eta + 2.509$ ,  $R^2 = 0.985$ ).

**Table S1** The spectral properties of probe **DASPBCI** in different solvents

| Solvent  | $\lambda_{\text{abs}}/\text{nm}$ | $\lambda_{\text{em}}/\text{nm}$ | Stokes shift/nm | $\epsilon/\times 10^4 \text{ M}^{-1}\text{cm}^{-1}$ | $\Phi/\%$ |
|----------|----------------------------------|---------------------------------|-----------------|-----------------------------------------------------|-----------|
| Toluene  | 480                              | 570                             | 90              | 0.54                                                | 5.6       |
| 1,4-Diox | 467                              | 579                             | 112             | 1.73                                                | 9.8       |
| DCM      | 522                              | 606                             | 84              | 2.91                                                | 2.4       |
| EtOAc    | 465                              | 585                             | 120             | 2.06                                                | 7.3       |
| THF      | 472                              | 590                             | 118             | 2.31                                                | 10.2      |
| Acetone  | 486                              | 618                             | 132             | 2.76                                                | 0.7       |
| EtOH     | 494                              | 604                             | 110             | 2.82                                                | 2.4       |
| MeOH     | 490                              | 611                             | 121             | 2.75                                                | 0.9       |
| MeCN     | 485                              | 620                             | 135             | 2.66                                                | 0.4       |
| DMF      | 484                              | 624                             | 140             | 2.54                                                | 5.5       |
| DMSO     | 486                              | 626                             | 140             | 2.29                                                | 3.0       |
| PBS      | 465                              | 612                             | 147             | 1.49                                                | 1.0       |
| Glycerol | 497                              | 611                             | 114             | 1.86                                                | 33.4      |

**Table S2** The spectral properties of probe **DASPB** in different solvents

| Solvent  | $\lambda_{\text{abs}}/\text{nm}$ | $\lambda_{\text{em}}/\text{nm}$ | Stokes shift /nm | $\epsilon/\times 10^4 \text{ M}^{-1}\text{cm}^{-1}$ | $\Phi/\%$ |
|----------|----------------------------------|---------------------------------|------------------|-----------------------------------------------------|-----------|
| Toluene  | 480                              | 572                             | 92               | 0.45                                                | 4.3       |
| 1,4-Diox | 465                              | 574                             | 109              | 2.60                                                | 13.5      |
| DCM      | 526                              | 608                             | 82               | 3.87                                                | 3.0       |
| EtOAc    | 465                              | 586                             | 121              | 2.98                                                | 11.8      |
| THF      | 471                              | 591                             | 120              | 3.26                                                | 18.9      |
| Acetone  | 485                              | 618                             | 133              | 3.54                                                | 0.9       |
| EtOH     | 492                              | 605                             | 113              | 3.42                                                | 2.3       |
| MeOH     | 488                              | 611                             | 123              | 3.31                                                | 1.0       |
| MeCN     | 483                              | 620                             | 137              | 3.36                                                | 0.5       |
| DMF      | 484                              | 623                             | 139              | 3.29                                                | 2.6       |
| DMSO     | 485                              | 625                             | 140              | 3.08                                                | 2.7       |
| PBS      | 462                              | 615                             | 153              | 2.27                                                | 0.6       |
| Glycerol | 496                              | 611                             | 115              | 2.26                                                | 35.4      |

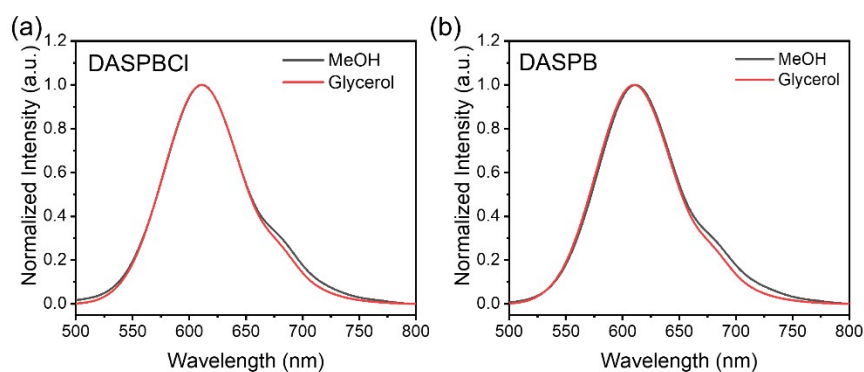

**Fig. S8.** The normalized fluorescence spectra of probe **DASPBCI** (a) and **DASPB** (b) in methanol and glycerol.

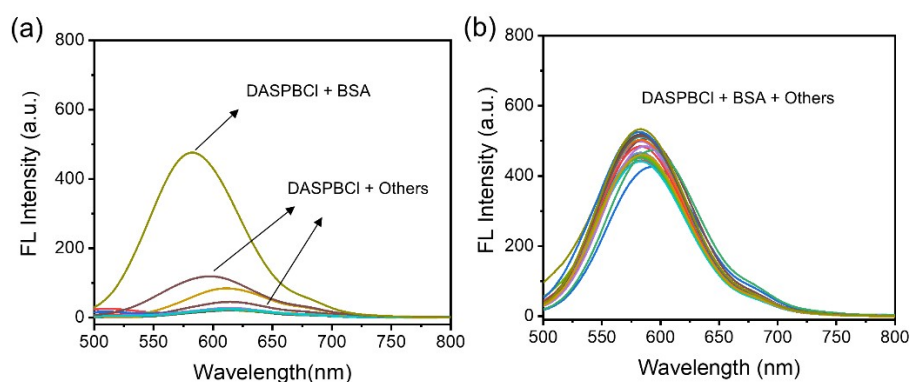

**Fig S9.** The selective test and the anti-interference detection of **DASPBCI** with BSA. (a) The selective test of **DASPBCI** probe to inorganic ions, amino acids and proteins for BSA. (b) The anti-interference detection of BSA by **DASPBCI** probe in the presence of various active substances. The concentration of all additives was 100  $\mu\text{M}$ , except BSA (10  $\mu\text{M}$ , 0.66 mg/mL) and myoglobin (44  $\mu\text{M}$ , 0.66 mg/mL).  $\lambda_{\text{exc}} = 480 \text{ nm}$ .

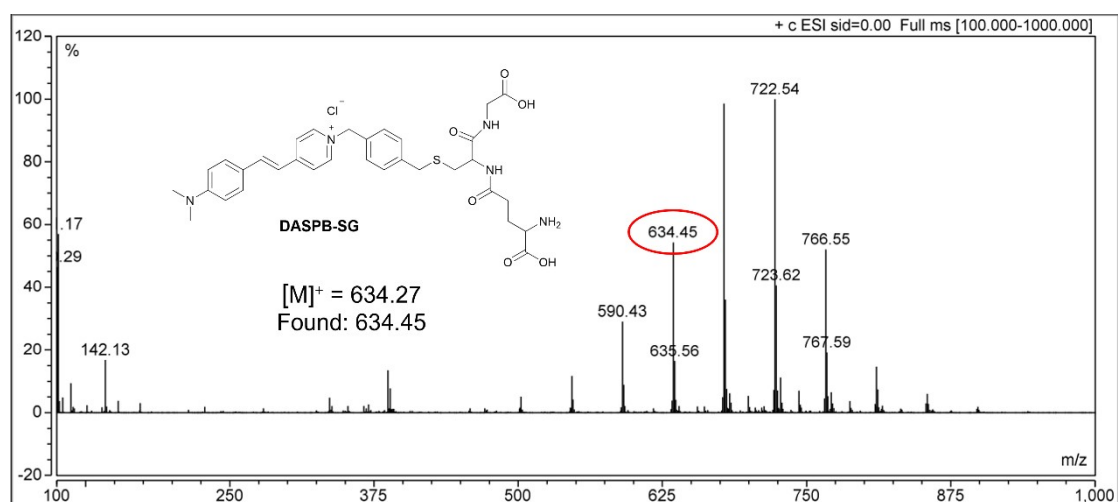

**Fig S10.** ESI-MS of the reaction solution of **DASPBCI** and GSH.





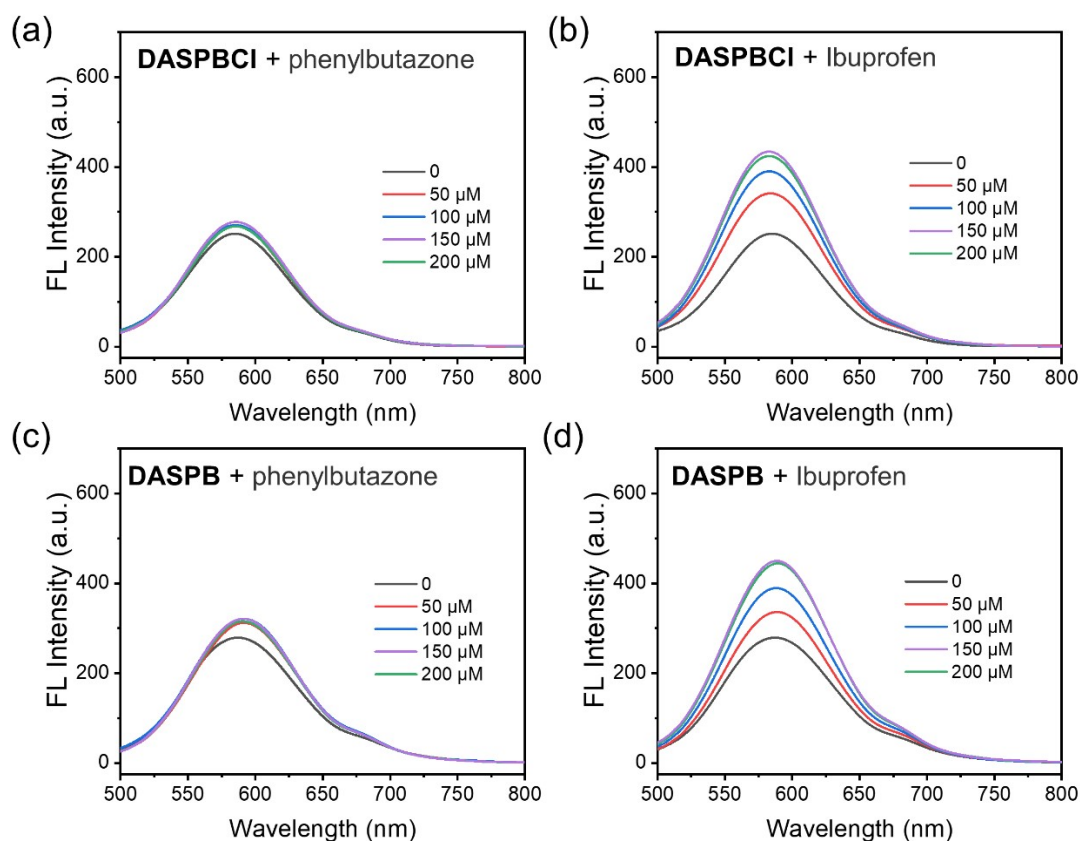

**Fig. S13.** The fluorescence spectra of **DASPBCI**-BSA (10  $\mu\text{M}$ ) complex with the addition of 0-200  $\mu\text{M}$  phenylbutazone (a) and ibuprofen (b); The fluorescence spectra of **DASPB**-BSA (10  $\mu\text{M}$ ) complex with the addition of 0-200  $\mu\text{M}$  phenylbutazone (c) and ibuprofen (d), respectively.

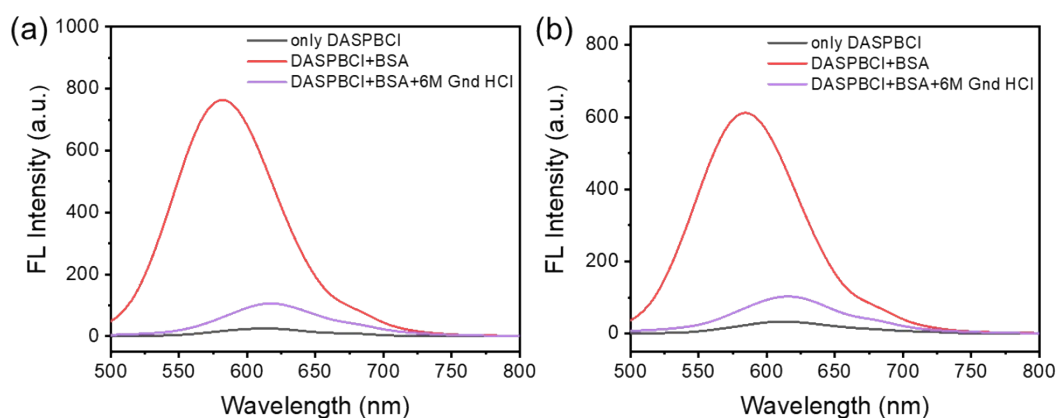

**Fig S14.** (a) Fluorescence spectra of **DASPBCI** with BSA (10  $\mu\text{M}$ ) and BSA pretreated with 6 M GndHCl in PBS for 30 min. (b) Fluorescence spectra of **DASPBCI** with BSA (10  $\mu\text{M}$ ) and followed by the addition of 6 M GndHCl for 30 min.  $\lambda_{\text{ex}} = 480 \text{ nm}$ .

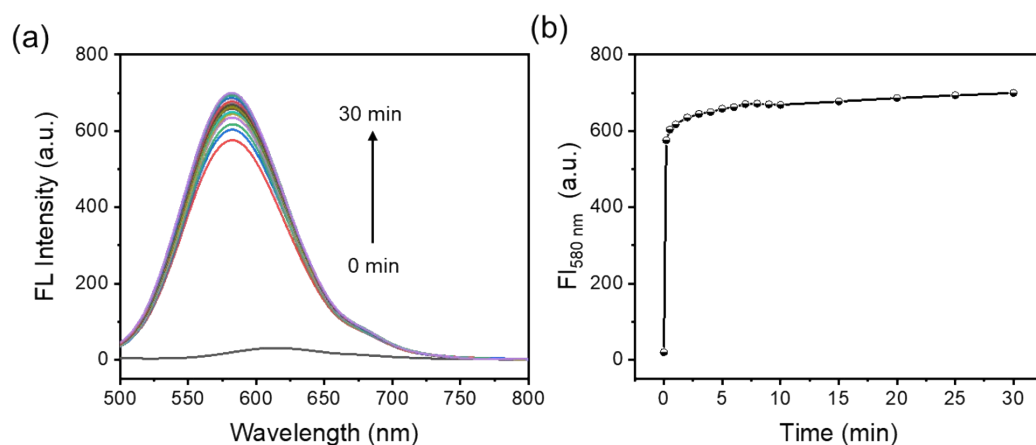

**Fig S15.** (a) Time-dependent fluorescence spectra of **DASPBCI** (10  $\mu\text{M}$ ) in PBS with BSA (10  $\mu\text{M}$ ).  $\lambda_{\text{ex}} = 480 \text{ nm}$ . (b) The fluorescence intensity (580 nm) of **DASPBCI** (10  $\mu\text{M}$ ) at different time.

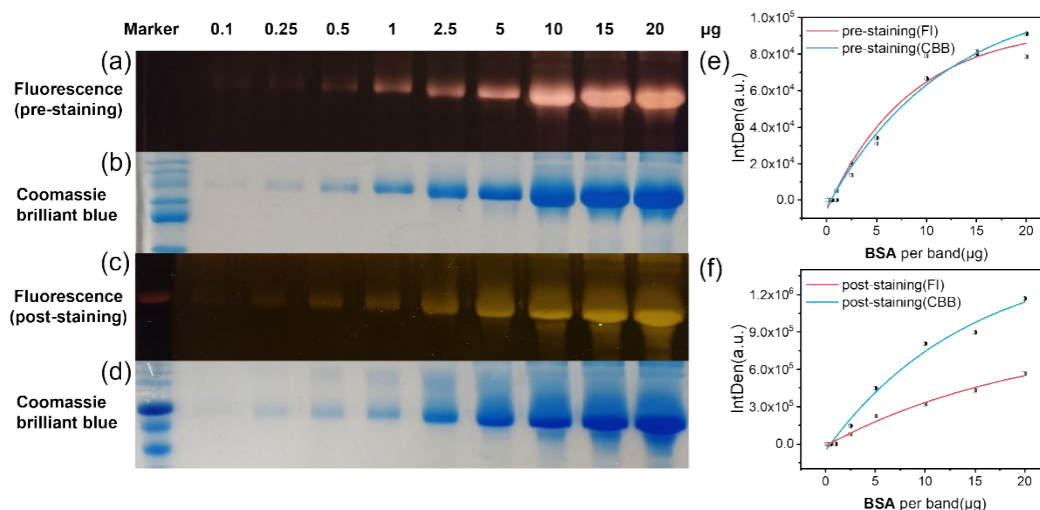

**Fig S16.** (a) SDS-PAGE fluorescence image of **DASPBCI** pre-stained BSA with various loaded amounts (0-20  $\mu\text{g}$ ) of protein and (b) image of the same gel stained with CBB. (c) Plots of fluorescence and CBB versus amount of BSA in the SDS-PAGE assay. (d) SDS-PAGE fluorescence image of **DASPBCI** poststained BSA with various loaded amounts and (e) image of the same gel stained with CBB. (f) Plots of fluorescence and CBB versus amount of BSA in the SDS-PAGE assay.

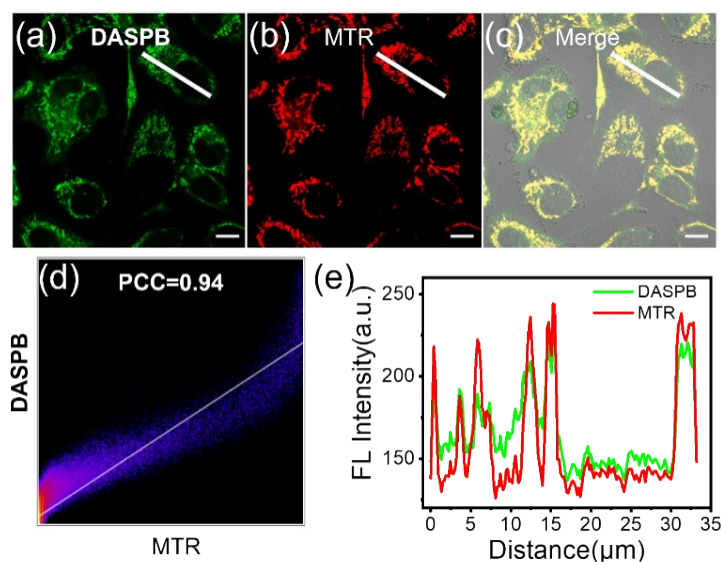

**Fig S17.** Fluorescence images of HeLa cells co-incubated with (a) **DASPb** (10  $\mu\text{M}$ , 1 h) and (b) **MTR** (0.2  $\mu\text{M}$ , 1 h). (c) Merged images. (d) Pearson's colocalization coefficient of **DASPb** with **MTR** (PCC = 0.94). (e) Fluorescence intensity distribution of a linear ROI across the cells. **DASPb**:  $\lambda_{\text{ex}} = 488 \text{ nm}$ ,  $\lambda_{\text{em}} = 500\text{--}590 \text{ nm}$ ; **MTR**:  $\lambda_{\text{ex}} = 561 \text{ nm}$ ,  $\lambda_{\text{em}} = 591\text{--}700 \text{ nm}$ . Scale bar: 10  $\mu\text{m}$ .

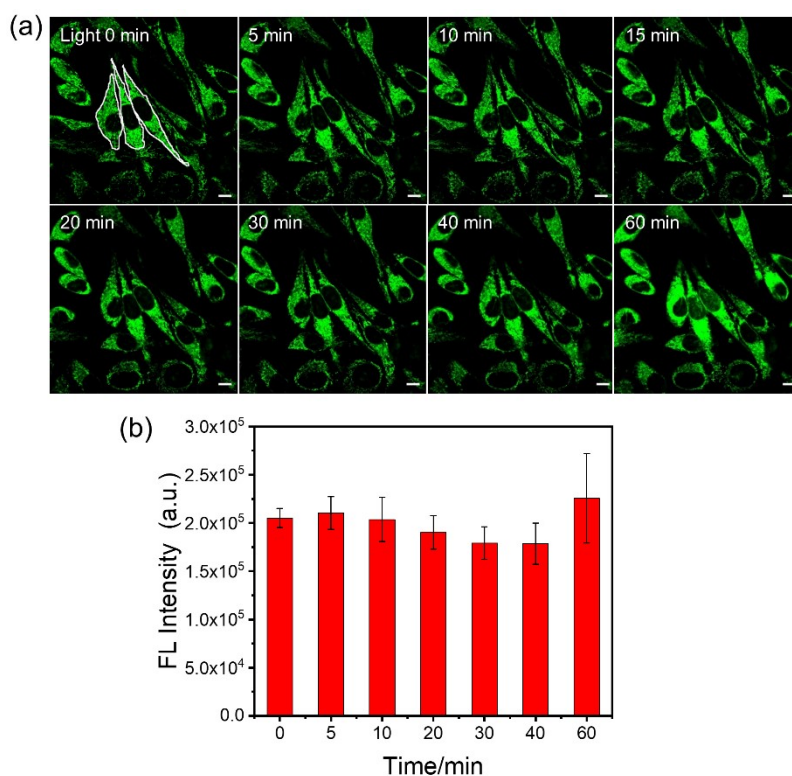

**Fig. S18.** (a) Fluorescence image of HeLa cells incubated with **DASPbCI** for 30 min under 488 laser irradiations for 60 min. (b) The calculated fluorescence intensity in (a).  $\lambda_{\text{ex}} = 488 \text{ nm}$ ,  $\lambda_{\text{em}} = 500\text{--}700 \text{ nm}$ . Scale bar: 10  $\mu\text{m}$ .

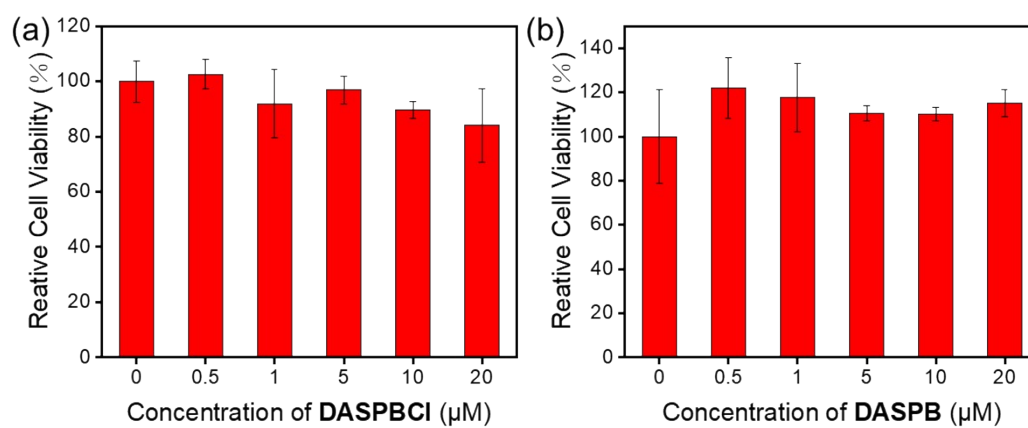

**Fig S19.** General cytotoxicity of probe **DASPBCI** (a) and **DASPB** (b) in living HeLa cells calculated by MTT assay. HeLa cells were incubated with probes (0-20 μM) for 24 h. Data are showed as the mean ± SD.
